# Supplementary material
Source: publisher site journal article supplement (https://www.spandidos-publications.com/5543/downloadSupplementary)
Supplement: Supplementary file 1 [file downloadSupplementary]

Table S1. Primer sequences.

| Gene           | Forward primer (5'-3')     | Reverse primer (5'-3') |
|----------------|----------------------------|------------------------|
| $\beta$ -actin | CCAGGAATTGCTGATCGTATGCAGAA | TGGAGAGGAAGCGAGGATAGA  |
| Gst-4          | CTGCAGAGGAAGAAGCTTAC       | GATCAGCGTCACTCCATAG    |
| Gst-25         | CTACGCTACCATGATCTACC       | GTTCTCTCCATTCTCGTAGG   |
| Hsp-12.3       | GAACGGGTATAAAAGGGGTC       | CAACTCCATCTCCTTTCTGG   |
| Hsp-12.6       | GTGATGGCTGACGAAGGAAC       | GGGAGGAAGTTATGGGCTTC   |
| Dod-22         | ACAAAGGACAAACGTGCAGC       | ATTGCACCCCGGAAACTAC    |
| Fat-7          | CGAGCATTGCCAAGAAGAT        | CCTGAGAACACATAGAGAGC   |
| Ins-7          | CAATTAGGTCCAGCAGAACC       | CTCGATTTCGCATGCTTTTCC  |
| Ins-23         | CTGGCTCAAGTCACTGATGC       | TCGAAGTTGCATATGTGGACGA |
| Rgba-1         | TTGGGCACTCGACTTCCTTC       | GCACAATATCCTGAGTTCGCG  |
| Ugt-37         | GACTGATGACTCTTCGATGG       | GAGCACATCTAGATTCTGCC   |
| Ugt-63         | CGGCTCACAAACATGCAACA       | GGGACGCTGGTGGAAATAGT   |

Gst, Glutathione S-transferase-4; Hsp, heat shock protein; Dod-22, downstream of DAF-16 protein DOD-22; Fat-7,  $\delta$ (9)-fatty-acid desaturase fat-7; Ins, insulin-like peptide; Rgba-1, regulatory gene for behavioral aging-1; Ugt, UDP-glucuronosyltransferase.
